# Supplementary material
Source: MDPI journal article supplement (https://www.mdpi.com/2624-5175/5/4/47)

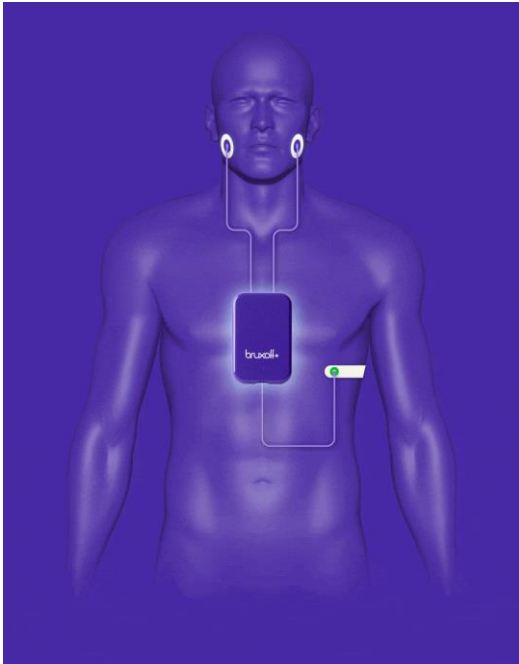

Figure S1. EMG-EKG Device (Bruxoff).

Supplement: s1 [file s1]
